# Supplementary material
Source: Research Square preprint supplement (doi:10.21203/rs.3.rs-8885838/v1)
Supplement: Supplementary file 1 [file 5d3b17b4aff0f7bbee497892.pdf]

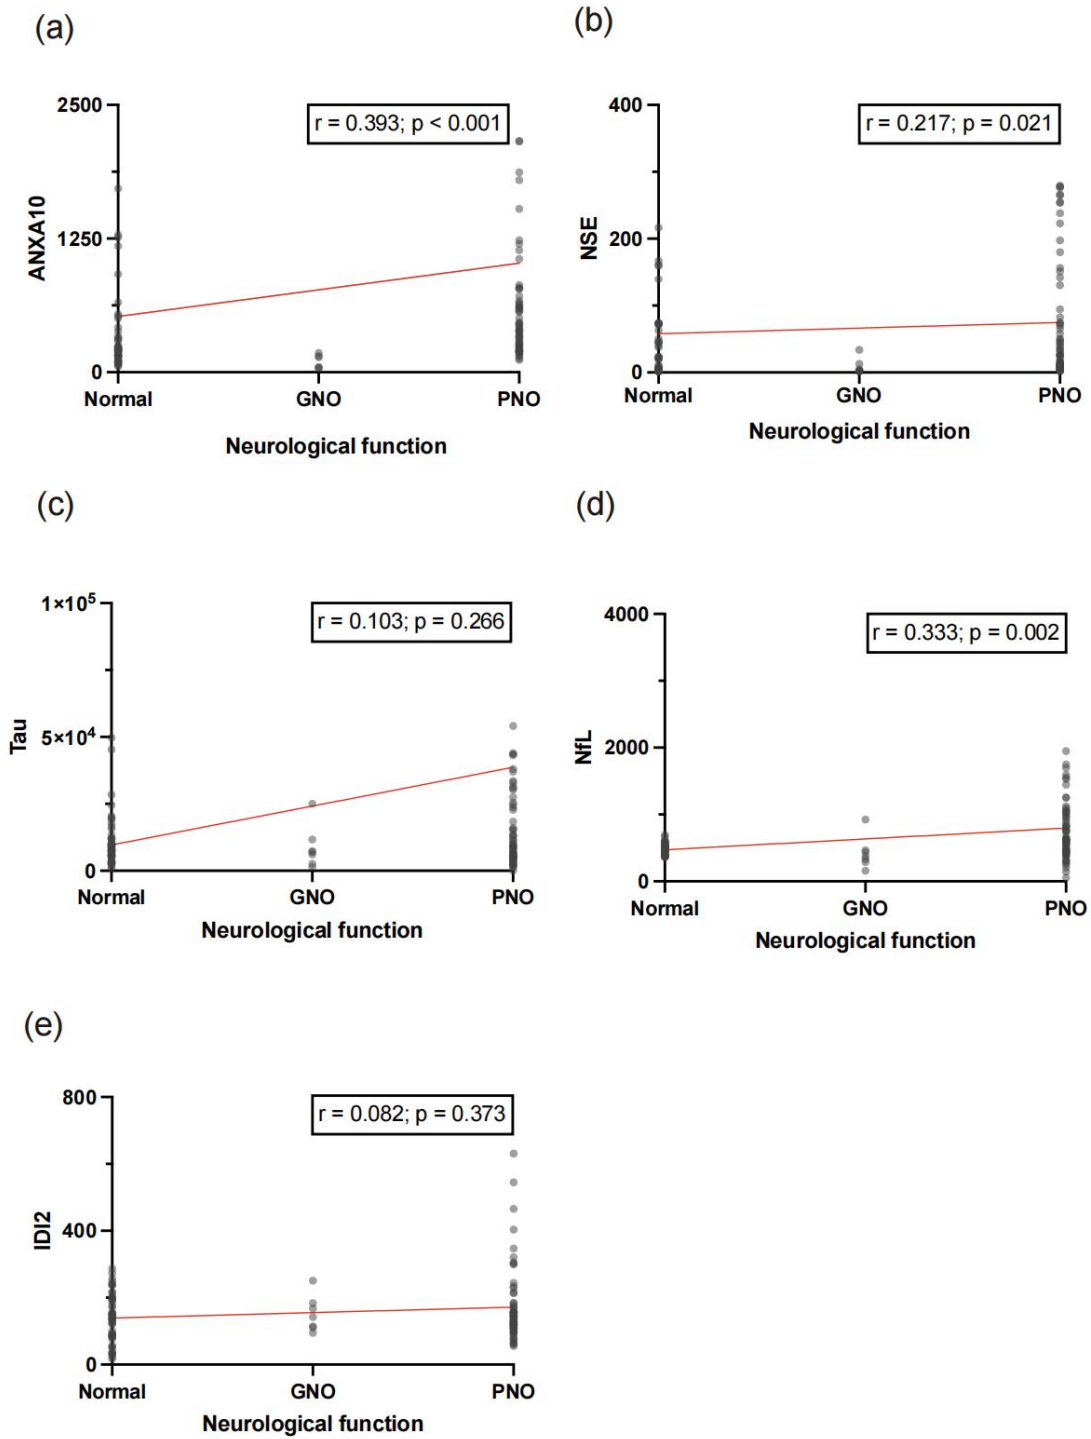

Supplementary Figure 4. Correlation between serum marker concentrations and different neurological functions. a Concentration differences of ANXA10 under three different neurological function states, which gradually increased from the normal state to PNO ( $P < 0.001$ ). b Protein concentration trend of NSE ( $P < 0.05$ ). c Protein concentration trend of Tau. d Protein concentration trend of NfL ( $P < 0.05$ ). e Protein concentration trend of IDI2, with no significant difference.
