# Supplementary material
Source: Research Square preprint supplement (doi:10.21203/rs.3.rs-8885838/v1)
Supplement: Supplementary file 2 [file 61a256eb0b228452d76dc3f2.pdf]

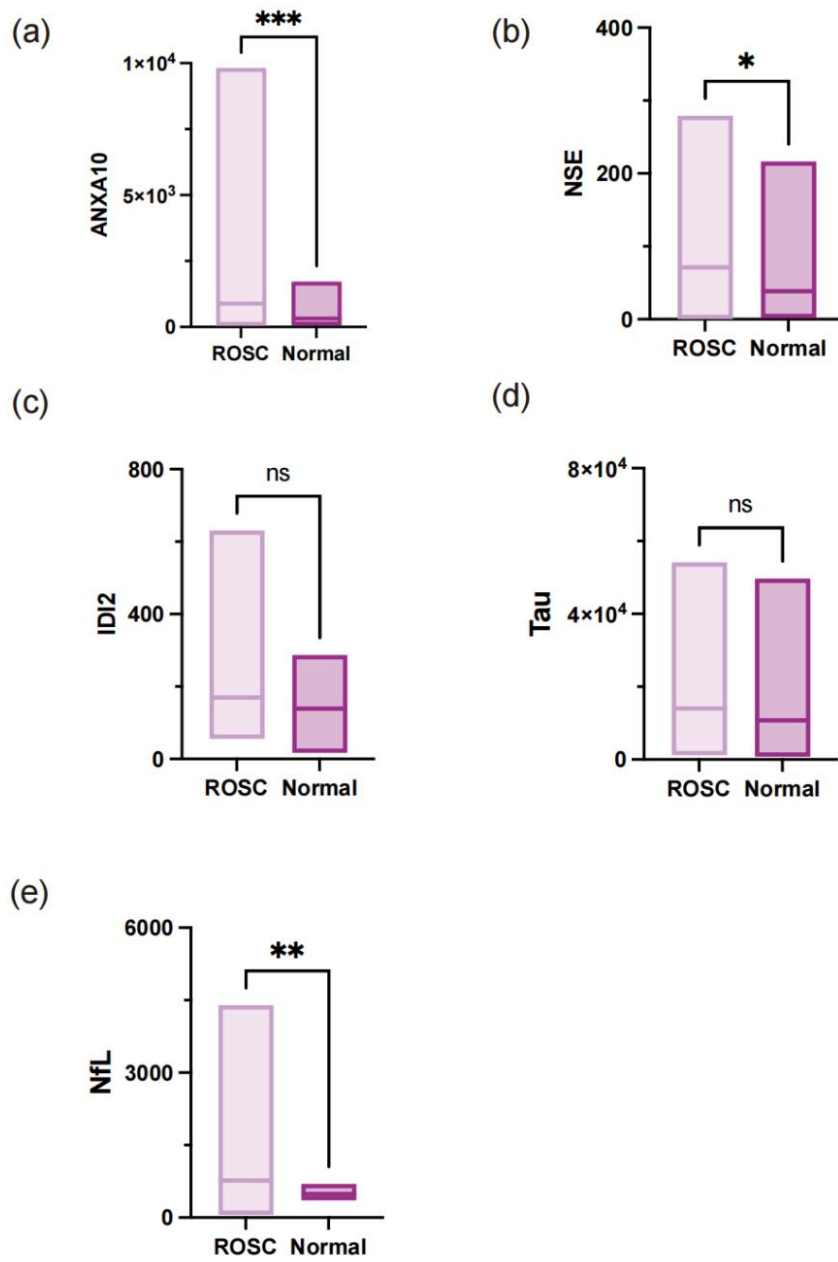

Supplementary Figure 3. Comparison of serum marker expression between normal individuals and ROSC patients. a ANXA10 protein expression. b NSE protein expression. c Serum IDI2 expression. d Tau protein expression. e NfL protein expression.
