# Supplementary material
Source: Research Square preprint supplement (doi:10.21203/rs.3.rs-8885838/v1)
Supplement: Supplementary file 3 [file 997291bf44b6d23e1c7532ef.pdf]

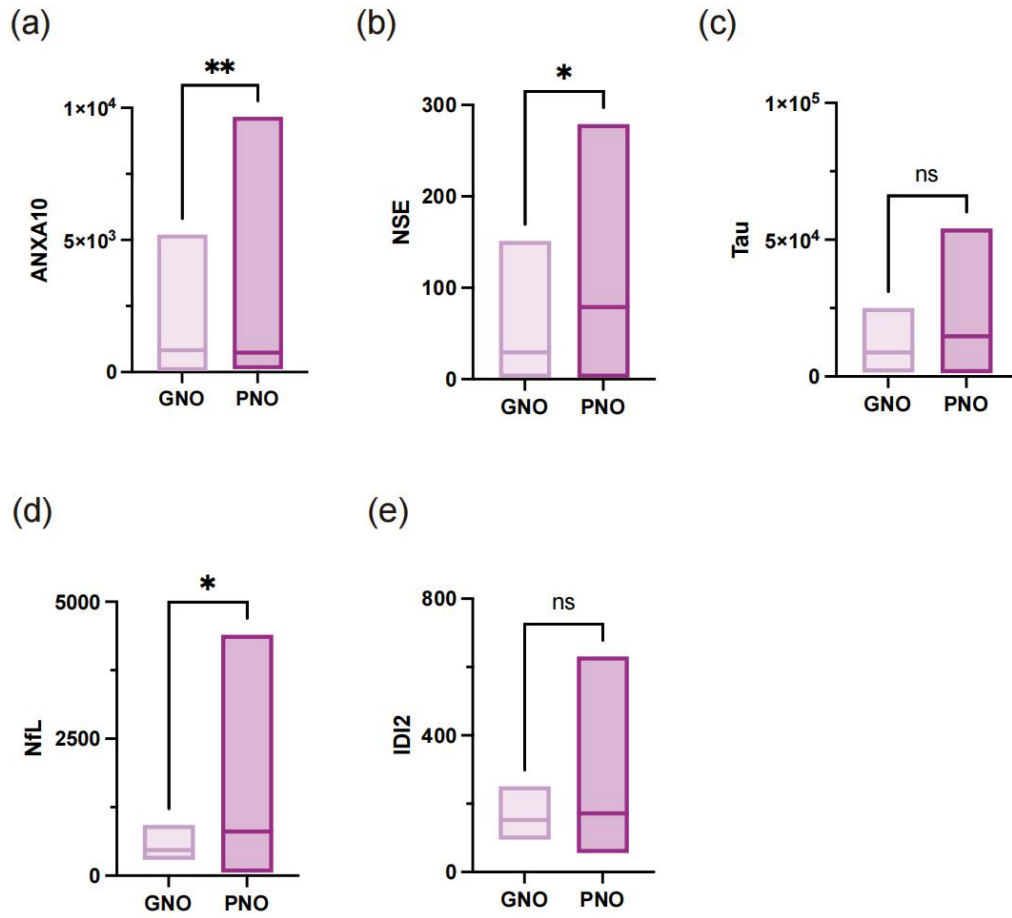

Supplementary Figure 2. ELISA results showing expression of serum markers in ROSC patients. a ANXA10 protein expression. b NSE protein expression. c Serum Tau expression. d NfL protein expression. e IDI2 protein expression.
