# Supplementary material
Source: Research Square preprint supplement (doi:10.21203/rs.3.rs-8885838/v1)
Supplement: Supplementary file 4 [file a5dba1a086c16a194440cff2.pdf]

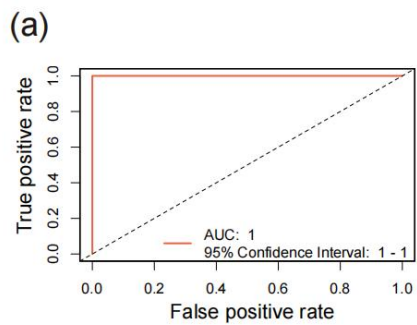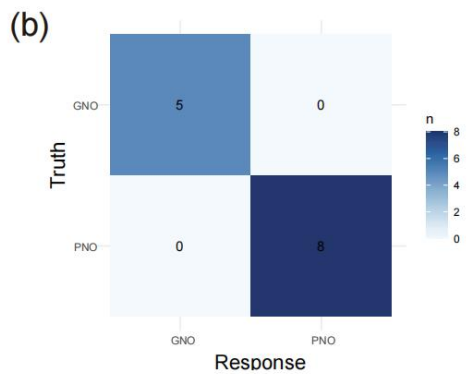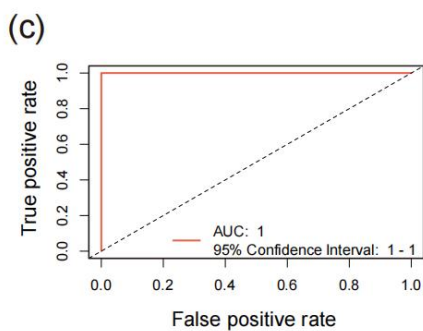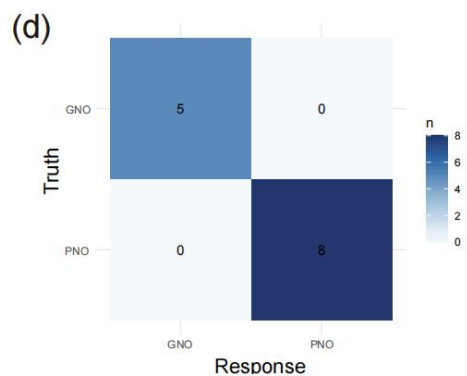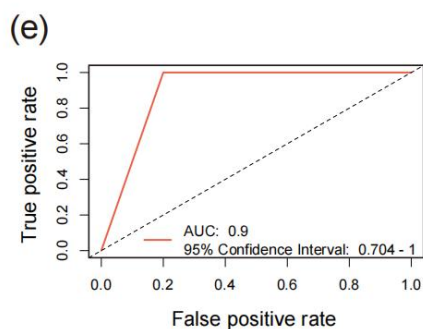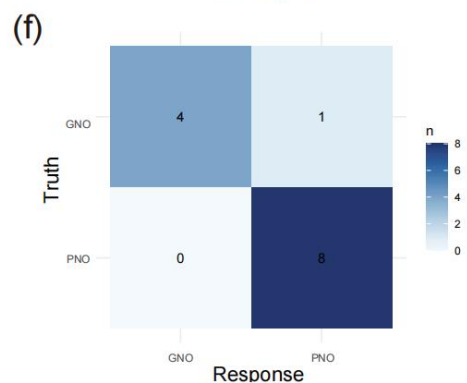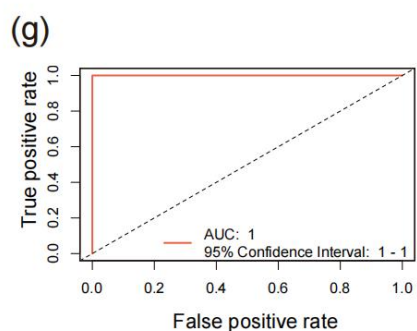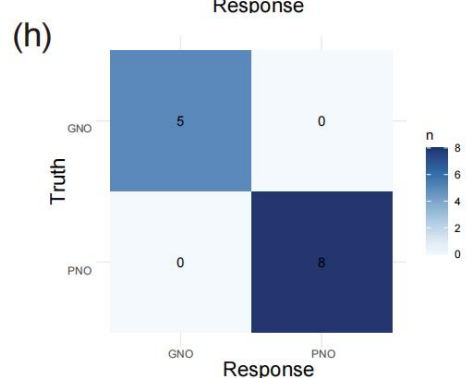

Supplementary Figure 1. ROC analysis of the results from four machine learning methods. a, b ROC analysis and confusion matrix values of the LASSO regression model. c, d ROC analysis and confusion matrix values of the random forest model. e, f ROC analysis and confusion matrix values of the Elastic Net model. g, h ROC analysis and confusion matrix values of the XGBoost model.
